# Supplementary material for: Ultrastructural alterations in the retinal pigment epithelium and photoreceptors of a Stargardt patient and three Stargardt mouse models: indication for the central role of RPE melanin in oxidative stress
Source: PeerJ. 2018 Jul 19;6:e5215. doi: 10.7717/peerj.5215 (PMC6054867; doi:10.7717/peerj.5215)
Supplement: Supplemental Information 2 — Raw data for photoreceptor nuclei quantification. [file peerj-06-5215-s005.xlsx]

## Sheet: Raw Data Fig. 1B
mouse strain	age [months]	number of nuclei per ROI
albino Abca4-/-	4	159
albino Abca4-/-	4	134
albino Abca4-/-	4	143
albino Abca4-/-	4	128
albino Abca4-/-	4	129
albino Abca4-/-	4	123
albino Abca4-/-	4	122
albino Abca4-/-	4	108
albino Abca4-/-	4	166
albino Abca4-/-	4	115
albino Abca4-/-	4	129
albino Abca4-/-	4	133
albino Abca4-/-	4	138
albino Abca4-/-	4	123
albino Abca4-/-	4	142
albino Abca4-/-	4	139
albino Abca4-/-	6	164
albino Abca4-/-	6	174
albino Abca4-/-	6	149
albino Abca4-/-	6	148
albino Abca4-/-	6	159
albino Abca4-/-	6	165
albino Abca4-/-	6	142
albino Abca4-/-	6	169
albino Abca4-/-	6	141
albino Abca4-/-	6	154
albino Abca4-/-	6	154
albino Abca4-/-	6	229
albino Abca4-/-	6	126
albino Abca4-/-	6	149
albino Abca4-/-	6	123
albino Abca4-/-	6	128
albino Abca4-/-	6	147
albino Abca4-/-	6	148
albino Abca4-/-	6	131
albino Abca4-/-	6	170
albino Abca4-/-	8	175
albino Abca4-/-	8	214
albino Abca4-/-	8	124
albino Abca4-/-	8	169
albino Abca4-/-	8	212
albino Abca4-/-	8	208
albino Abca4-/-	8	220
albino Abca4-/-	8	196
albino Abca4-/-	8	193
albino Abca4-/-	8	124
albino Abca4-/-	8	159
albino Abca4-/-	8	125
albino Abca4-/-	8	122
albino Abca4-/-	8	141
albino Abca4-/-	8	145
albino Abca4-/-	8	172
albino Abca4-/-	8	146
albino Abca4-/-	8	146
albino Abca4-/-	9	127
albino Abca4-/-	9	141
albino Abca4-/-	9	214
albino Abca4-/-	9	147
albino Abca4-/-	9	144
albino Abca4-/-	9	149
albino Abca4-/-	9	174
albino Abca4-/-	9	213
albino Abca4-/-	9	213
albino Abca4-/-	9	251
albino Abca4-/-	9	210
albino Abca4-/-	9	206
albino Abca4-/-	9	162
albino Abca4-/-	9	182
albino Abca4-/-	9	161
albino Abca4-/-	9	204
albino Abca4-/-	9	155
albino Abca4-/-	9	234
albino Abca4-/-	9	191
albino Abca4-/-	9	120
albino Abca4-/-	9	156
albino Abca4-/-	9	139
albino Abca4-/-	9	157
albino Abca4-/-	9	118
albino Abca4-/-	9	159
albino Abca4-/-	9	145
albino Abca4-/-	9	141
albino Abca4-/-	9	151
albino Abca4-/-	9	154
albino Abca4-/-	9	153
albino Abca4-/-	9	154
albino Abca4-/-	9	153
albino Abca4-/-	9	137
albino Abca4-/-	9	114
albino Abca4-/-	9	140
albino Abca4-/-	9	141
albino Abca4-/-	9	124
albino Abca4-/-	9	113
albino Abca4-/-	9	161
albino Abca4-/-	9	138
albino Abca4-/-	9	130
albino Abca4-/-	9	147
albino Abca4-/-	9	136
albino Abca4-/-	9	139
albino Abca4-/-	9	147
albino Abca4-/-	9	139
albino Abca4-/-	9	119
albino Abca4-/-	9	134
albino Abca4-/-	9	148
albino Abca4-/-	9	143
albino Abca4-/-	9	152
albino Abca4-/-	9	130
albino Abca4-/-	9	120
albino Abca4-/-	9	121
albino Abca4-/-	9	134
albino Abca4-/-	9	119
albino Abca4-/-	9	150
albino Abca4-/-	9	142
albino Abca4-/-	9	133
albino Abca4-/-	9	117
albino Abca4-/-	9	140
albino Abca4-/-	9	126
albino Abca4-/-	9	119
albino Abca4-/-	9	120
albino Abca4-/-	9	128
albino Abca4-/-	9	142
albino Abca4-/-	9	133
albino Abca4-/-	9	138
albino Abca4-/-	9	128
albino Abca4-/-	9	144
albino Abca4-/-	9	115
albino Abca4-/-	9	126
albino Abca4-/-	9	106
albino Abca4-/-	9	123
albino Abca4-/-	9	125
albino Abca4-/-	9	116
albino Abca4-/-	9	108
albino Abca4-/-	9	99
albino Abca4-/-	9	104
albino Abca4-/-	9	107
albino Abca4-/-	12	150
albino Abca4-/-	12	131
albino Abca4-/-	12	144
albino Abca4-/-	12	125
albino Abca4-/-	12	144
albino Abca4-/-	12	146
albino Abca4-/-	12	128
albino Abca4-/-	12	159
albino Abca4-/-	12	154
albino Abca4-/-	12	152
albino Abca4-/-	12	135
albino Abca4-/-	12	129
albino Abca4-/-	12	134
albino Abca4-/-	12	102
albino Abca4-/-	12	122
albino Abca4-/-	12	105
albino Abca4-/-	12	124
albino Abca4-/-	12	154
albino Abca4-/-	12	135
albino Abca4-/-	12	143
albino Abca4-/-	12	128
albino Abca4-/-	12	128
albino Abca4-/-	12	120
albino Abca4-/-	12	107
albino Abca4-/-	12	84
albino Abca4-/-	12	122
albino Abca4-/-	12	104
albino Abca4-/-	12	129
albino Abca4-/-	12	82
albino Abca4-/-	12	125
albino Abca4-/-	12	104
albino Abca4-/-	12	105
albino Abca4-/-	12	80
albino Abca4-/-	12	92
albino Abca4-/-	12	106
albino Abca4-/-	12	96
albino Abca4-/-	12	168
albino Abca4-/-	12	132
albino Abca4-/-	12	139
albino Abca4-/-	12	106
albino Abca4-/-	12	105
albino Abca4-/-	12	129
albino Abca4-/-	12	145
albino Abca4-/-	12	127
albino Abca4-/-	12	121
albino Abca4-/-	12	122
albino Abca4-/-	12	120
albino Abca4-/-	12	113
albino Abca4-/-	12	110
albino Abca4-/-	12	112
albino Abca4-/-	12	106
albino Abca4-/-	12	127
albino Abca4-/-	14	86
albino Abca4-/-	14	146
albino Abca4-/-	14	142
albino Abca4-/-	14	105
albino Abca4-/-	14	135
albino Abca4-/-	14	98
albino Abca4-/-	14	109
albino Abca4-/-	14	93
albino Abca4-/-	14	127
albino Abca4-/-	15	125
albino Abca4-/-	15	110
albino Abca4-/-	15	108
albino Abca4-/-	15	112
albino Abca4-/-	15	99
albino Abca4-/-	15	97
albino Abca4-/-	15	106
albino Abca4-/-	15	109
albino Abca4-/-	15	91
albino Abca4-/-	15	103
albino Abca4-/-	15	127
albino Abca4-/-	15	142
albino Abca4-/-	15	120
albino Abca4-/-	15	134
albino Abca4-/-	15	133
albino Abca4-/-	15	156
albino Abca4-/-	15	136
albino Abca4-/-	18	120
albino Abca4-/-	18	136
albino Abca4-/-	18	155
albino Abca4-/-	18	154
albino Abca4-/-	18	157
albino Abca4-/-	18	153
albino Abca4-/-	18	147
albino Abca4-/-	18	134
albino Abca4-/-	18	143
albino Abca4-/-	18	149
albino Abca4-/-	18	125
albino Abca4-/-	18	118
albino Abca4-/-	18	135
albino Abca4-/-	19	117
albino Abca4-/-	19	113
albino Abca4-/-	19	100
albino Abca4-/-	19	96
albino Abca4-/-	19	122
albino Abca4-/-	19	127
albino Abca4-/-	19	120
albino Abca4-/-	19	149
albino Abca4-/-	19	171
albino Abca4-/-	19	153
albino Abca4-/-	19	89
albino Abca4-/-	19	129
albino Abca4-/-	19	118
albino Abca4-/-	19	127
albino Abca4-/-	19	145
albino Abca4-/-	19	156
albino Abca4-/-	19	140
albino Abca4-/-	19	167
albino Abca4-/-	19	124
albino Abca4-/-	19	119
albino Abca4-/-	19	104
albino Abca4-/-	19	103
albino Abca4-/-	19	107
albino Abca4-/-	19	79
albino Abca4-/-	19	104
albino Abca4-/-	19	99
albino Abca4-/-	19	112
albino Abca4-/-	19	139
albino Abca4-/-	19	108
albino Abca4-/-	19	124
albino Abca4-/-	19	126
albino Abca4-/-	19	140
albino Abca4-/-	19	136
albino Abca4-/-	19	128
albino Abca4-/-	19	127
albino Abca4-/-	19	112
albino Abca4-/-	19	120
albino Abca4-/-	19	121
albino Abca4-/-	19	105
albino Abca4-/-	19	143
albino Abca4-/-	19	123
albino Abca4-/-	19	112
albino Abca4-/-	19	146
albino Abca4-/-	19	126
albino Abca4-/-	19	130
albino Abca4-/-	19	129
albino Abca4-/-	19	106
albino Abca4-/-	19	139
albino Abca4-/-	19	140
albino Abca4-/-	19	112
albino Abca4-/-	19	150
albino Abca4-/-	19	116
albino Abca4-/-	19	101
albino Abca4-/-	19	115
albino Abca4-/-	19	130
albino Abca4-/-	19	131
albino Abca4-/-	19	110
albino Abca4-/-	19	117
albino Abca4-/-	19	123
albino Abca4-/-	19	106
albino Abca4-/-	19	160
albino Abca4-/-	19	163
albino Abca4-/-	19	126
albino Abca4-/-	19	142
albino Abca4-/-	19	147
albino Abca4-/-	19	130
albino Abca4-/-	19	116
albino Abca4-/-	19	147
albino Abca4-/-	19	149
albino Abca4-/-	19	132
albino Abca4-/-	19	135
albino Abca4-/-	19	117
albino Abca4-/-	19	129
albino Abca4-/-	19	163
albino Abca4-/-	19	138
albino Abca4-/-	19	140
albino Abca4-/-	19	140
albino Abca4-/-	19	115
albino Abca4-/-	19	120
albino Abca4-/-	19	150
albino Abca4-/-	19	129
albino Abca4-/-	19	126
albino Abca4-/-	19	153
albino Abca4-/-	19	183
albino Abca4-/-	19	183
albino Abca4-/-	19	119
albino Abca4-/-	19	124
albino Abca4-/-	19	115
albino Abca4-/-	19	96
albino Abca4-/-	19	143
albino Abca4-/-	19	96
albino Abca4-/-	19	113
albino Abca4-/-	19	92
albino Abca4-/-	19	91
albino Abca4-/-	19	120
albino Abca4-/-	19	90
albino Abca4-/-	19	117
albino Abca4-/-	19	128
albino Abca4-/-	19	64
albino Abca4-/-	19	139
albino Abca4-/-	19	123
albino Abca4-/-	19	145
albino Abca4-/-	19	164
albino Abca4-/-	19	161
albino Abca4-/-	19	149
albino Abca4-/-	19	152
albino Abca4-/-	19	143
albino Abca4-/-	19	139
albino Abca4-/-	19	143
albino Abca4-/-	19	148
albino Abca4-/-	19	157
albino Abca4-/-	19	137
albino Abca4-/-	19	167
albino Abca4-/-	21	93
albino Abca4-/-	21	91
albino Abca4-/-	21	103
albino Abca4-/-	21	124
albino Abca4-/-	21	125
albino Abca4-/-	21	103
albino Abca4-/-	21	128
albino Abca4-/-	21	115
albino Abca4-/-	21	117
albino Abca4-/-	21	98
albino Abca4-/-	21	109
albino Abca4-/-	21	119
albino Abca4-/-	21	90
albino Abca4-/-	21	96
albino Abca4-/-	21	117
albino Abca4-/-	21	118
albino Abca4-/-	21	85
albino Abca4-/-	21	151
albino Abca4-/-	21	103
albino Abca4-/-	21	86
albino Abca4-/-	21	75
albino Abca4-/-	21	82
albino Abca4-/-	21	67
albino Abca4-/-	21	88
albino Abca4-/-	21	87
albino Abca4-/-	21	92
albino Abca4-/-	21	100
albino Abca4-/-	21	107
albino Abca4-/-	21	116
albino Abca4-/-	21	126
albino Abca4-/-	21	113
albino Abca4-/-	27	88
albino Abca4-/-	27	86
albino Abca4-/-	27	97
albino Abca4-/-	27	72
albino Abca4-/-	27	92
albino Abca4-/-	27	71
albino Abca4-/-	27	68
albino Abca4-/-	27	92
albino Abca4-/-	27	103
albino Abca4-/-	27	89
albino Abca4-/-	27	86
albino Abca4-/-	27	89
albino Abca4-/-	27	106
albino Abca4-/-	27	83
albino Abca4-/-	27	72
Abca4.Rdh8-/-	3	167
Abca4.Rdh8-/-	3	182
Abca4.Rdh8-/-	3	169
Abca4.Rdh8-/-	3	140
Abca4.Rdh8-/-	3	186
Abca4.Rdh8-/-	3	165
Abca4.Rdh8-/-	3	140
Abca4.Rdh8-/-	3	138
Abca4.Rdh8-/-	3	156
Abca4.Rdh8-/-	3	148
Abca4.Rdh8-/-	3	159
Abca4.Rdh8-/-	3	174
Abca4.Rdh8-/-	6	184
Abca4.Rdh8-/-	6	181
Abca4.Rdh8-/-	6	204
Abca4.Rdh8-/-	6	221
Abca4.Rdh8-/-	6	184
Abca4.Rdh8-/-	6	179
Abca4.Rdh8-/-	6	174
Abca4.Rdh8-/-	6	187
Abca4.Rdh8-/-	6	189
Abca4.Rdh8-/-	6	162
Abca4.Rdh8-/-	6	172
Abca4.Rdh8-/-	6	160
Abca4.Rdh8-/-	6	133
Abca4.Rdh8-/-	6	171
Abca4.Rdh8-/-	6	195
Abca4.Rdh8-/-	6	178
Abca4.Rdh8-/-	6	172
Abca4.Rdh8-/-	6	203
Abca4.Rdh8-/-	6	168
Abca4.Rdh8-/-	6	164
Abca4.Rdh8-/-	6	180
Abca4.Rdh8-/-	6	113
Abca4.Rdh8-/-	6	135
Abca4.Rdh8-/-	6	142
Abca4.Rdh8-/-	6	143
Abca4.Rdh8-/-	6	129
Abca4.Rdh8-/-	6	125
Abca4.Rdh8-/-	6	139
Abca4.Rdh8-/-	6	143
Abca4.Rdh8-/-	6	150
Abca4.Rdh8-/-	6	142
Abca4.Rdh8-/-	6	138
Abca4.Rdh8-/-	7	161
Abca4.Rdh8-/-	7	190
Abca4.Rdh8-/-	7	148
Abca4.Rdh8-/-	7	154
Abca4.Rdh8-/-	7	129
Abca4.Rdh8-/-	7	140
Abca4.Rdh8-/-	7	143
Abca4.Rdh8-/-	7	157
Abca4.Rdh8-/-	7	140
Abca4.Rdh8-/-	7	149
Abca4.Rdh8-/-	7	111
Abca4.Rdh8-/-	7	154
Abca4.Rdh8-/-	7	132
Abca4.Rdh8-/-	7	121
Abca4.Rdh8-/-	7	126
Abca4.Rdh8-/-	7	107
Abca4.Rdh8-/-	7	106
Abca4.Rdh8-/-	7	139
Abca4.Rdh8-/-	7	144
Abca4.Rdh8-/-	7	131
Abca4.Rdh8-/-	7	136
Abca4.Rdh8-/-	7	141
Abca4.Rdh8-/-	7	145
Abca4.Rdh8-/-	7	109
Abca4.Rdh8-/-	7	115
Abca4.Rdh8-/-	9	166
Abca4.Rdh8-/-	9	191
Abca4.Rdh8-/-	9	161
Abca4.Rdh8-/-	9	167
Abca4.Rdh8-/-	9	148
Abca4.Rdh8-/-	9	168
Abca4.Rdh8-/-	11	130
Abca4.Rdh8-/-	11	145
Abca4.Rdh8-/-	11	147
Abca4.Rdh8-/-	11	184
Abca4.Rdh8-/-	11	168
Abca4.Rdh8-/-	11	136
Abca4.Rdh8-/-	11	152
Abca4.Rdh8-/-	11	155
Abca4.Rdh8-/-	11	144
Abca4.Rdh8-/-	11	157
Abca4.Rdh8-/-	11	159
Abca4.Rdh8-/-	11	97
Abca4.Rdh8-/-	11	175
Abca4.Rdh8-/-	11	162
Abca4.Rdh8-/-	11	134
Abca4.Rdh8-/-	11	137
Abca4.Rdh8-/-	11	119
Abca4.Rdh8-/-	11	128
Abca4.Rdh8-/-	11	117
Abca4.Rdh8-/-	11	137
Abca4.Rdh8-/-	11	133
Abca4.Rdh8-/-	11	165
Abca4.Rdh8-/-	11	105
Abca4.Rdh8-/-	11	162
Abca4.Rdh8-/-	11	184
Abca4.Rdh8-/-	12	148
Abca4.Rdh8-/-	12	187
Abca4.Rdh8-/-	12	165
Abca4.Rdh8-/-	12	168
Abca4.Rdh8-/-	12	157
Abca4.Rdh8-/-	12	158
Abca4.Rdh8-/-	12	138
Abca4.Rdh8-/-	12	160
Abca4.Rdh8-/-	12	180
Abca4.Rdh8-/-	12	136
Abca4.Rdh8-/-	12	145
Abca4.Rdh8-/-	12	154
Abca4.Rdh8-/-	12	152
Abca4.Rdh8-/-	12	146
Abca4.Rdh8-/-	12	165
Abca4.Rdh8-/-	12	165
Abca4.Rdh8-/-	12	172
Abca4.Rdh8-/-	12	160
Abca4.Rdh8-/-	12	171
Abca4.Rdh8-/-	12	187
Abca4.Rdh8-/-	12	153
Abca4.Rdh8-/-	12	187
Abca4.Rdh8-/-	12	146
Abca4.Rdh8-/-	12	173
Abca4.Rdh8-/-	12	185
Abca4.Rdh8-/-	12	138
Abca4.Rdh8-/-	12	126
Abca4.Rdh8-/-	12	121
Abca4.Rdh8-/-	12	162
Abca4.Rdh8-/-	12	155
Abca4.Rdh8-/-	12	128
Abca4.Rdh8-/-	12	118
Abca4.Rdh8-/-	12	120
Abca4.Rdh8-/-	12	80
Abca4.Rdh8-/-	12	121
Abca4.Rdh8-/-	12	105
Abca4.Rdh8-/-	12	134
Abca4.Rdh8-/-	12	115
Abca4.Rdh8-/-	12	235
Abca4.Rdh8-/-	12	171
Abca4.Rdh8-/-	12	208
Abca4.Rdh8-/-	12	182
Abca4.Rdh8-/-	12	99
Abca4.Rdh8-/-	12	243
Abca4.Rdh8-/-	12	210
Abca4.Rdh8-/-	12	188
Abca4.Rdh8-/-	12	220
Abca4.Rdh8-/-	12	195
Abca4.Rdh8-/-	13	183
Abca4.Rdh8-/-	13	200
Abca4.Rdh8-/-	13	187
Abca4.Rdh8-/-	13	203
Abca4.Rdh8-/-	13	197
Abca4.Rdh8-/-	13	174
Abca4.Rdh8-/-	13	232
Abca4.Rdh8-/-	13	218
Abca4.Rdh8-/-	13	190
Abca4.Rdh8-/-	13	197
Abca4.Rdh8-/-	13	235
Abca4.Rdh8-/-	13	148
Abca4.Rdh8-/-	13	155
Abca4.Rdh8-/-	13	169
Abca4.Rdh8-/-	13	162
Abca4.Rdh8-/-	13	156
Abca4.Rdh8-/-	13	172
Abca4.Rdh8-/-	13	183
Abca4.Rdh8-/-	13	178
Abca4.Rdh8-/-	13	148
Abca4.Rdh8-/-	13	164
Abca4.Rdh8-/-	13	160
Abca4.Rdh8-/-	13	152
Abca4.Rdh8-/-	13	176
Abca4.Rdh8-/-	13	158
Abca4.Rdh8-/-	13	169
Abca4.Rdh8-/-	13	165
Abca4.Rdh8-/-	13	180
Abca4.Rdh8-/-	13	183
Abca4.Rdh8-/-	13	154
Abca4.Rdh8-/-	14	140
Abca4.Rdh8-/-	14	153
Abca4.Rdh8-/-	14	161
Abca4.Rdh8-/-	14	160
Abca4.Rdh8-/-	14	166
Abca4.Rdh8-/-	14	167
Abca4.Rdh8-/-	14	162
Abca4.Rdh8-/-	14	157
Abca4.Rdh8-/-	14	156
Abca4.Rdh8-/-	14	155
Abca4.Rdh8-/-	14	138
Abca4.Rdh8-/-	14	156
Abca4.Rdh8-/-	14	123
Abca4.Rdh8-/-	14	79
Abca4.Rdh8-/-	23	139
Abca4.Rdh8-/-	23	167
Abca4.Rdh8-/-	23	164
Abca4.Rdh8-/-	23	168
Abca4.Rdh8-/-	23	167
Abca4.Rdh8-/-	23	158
Abca4.Rdh8-/-	23	155
Abca4.Rdh8-/-	23	190
Abca4.Rdh8-/-	23	115
Abca4.Rdh8-/-	23	120
Abca4.Rdh8-/-	23	128
Abca4.Rdh8-/-	23	120
Abca4.Rdh8-/-	23	150
Abca4.Rdh8-/-	23	147
Abca4.Rdh8-/-	23	162
Abca4.Rdh8-/-	23	163
Abca4.Rdh8-/-	23	131
Abca4.Rdh8-/-	23	130
Abca4.Rdh8-/-	25	129
Abca4.Rdh8-/-	25	156
Abca4.Rdh8-/-	25	142
Abca4.Rdh8-/-	25	162
Abca4.Rdh8-/-	25	158
Abca4.Rdh8-/-	25	140
Abca4.Rdh8-/-	25	130
Abca4.Rdh8-/-	25	125
Abca4.Rdh8-/-	25	126
Abca4.Rdh8-/-	25	121
Abca4.Rdh8-/-	25	146
Abca4.Rdh8-/-	25	159
Abca4.Rdh8-/-	25	142
Abca4.Rdh8-/-	25	168
Abca4.Rdh8-/-	25	157
Abca4.Rdh8-/-	25	153
Abca4.Rdh8-/-	25	121
Abca4.Rdh8-/-	25	144
Abca4.Rdh8-/-	25	161
Abca4.Rdh8-/-	25	170
Abca4.Rdh8-/-	25	164
Abca4.Rdh8-/-	25	145
Abca4.Rdh8-/-	25	152
Abca4.Rdh8-/-	25	135
Abca4.Rdh8-/-	25	148
Abca4.Rdh8-/-	9	186
Abca4.Rdh8-/-	9	182
Abca4.Rdh8-/-	9	168
Abca4.Rdh8-/-	9	168
Abca4.Rdh8-/-	9	154
Abca4.Rdh8-/-	9	160
Abca4.Rdh8-/-	9	141
Abca4.Rdh8-/-	12	116
Abca4.Rdh8-/-	12	148
Abca4.Rdh8-/-	12	140
Abca4.Rdh8-/-	12	131
Abca4.Rdh8-/-	12	127
Abca4.Rdh8-/-	12	140
Abca4.Rdh8-/-	12	111
Abca4.Rdh8-/-	12	131
Abca4.Rdh8-/-	12	141
Abca4.Rdh8-/-	12	139
Abca4.Rdh8-/-	12	145
Abca4.Rdh8-/-	12	140
Abca4.Rdh8-/-	12	117
Abca4.Rdh8-/-	12	180
Abca4.Rdh8-/-	12	175
Abca4.Rdh8-/-	12	155
Abca4.Rdh8-/-	12	147
Abca4.Rdh8-/-	12	119
Abca4.Rdh8-/-	12	121
Abca4.Rdh8-/-	12	160
Abca4.Rdh8-/-	12	165
Abca4.Rdh8-/-	12	144
Abca4.Rdh8-/-	12	167
Abca4.Rdh8-/-	12	184
Abca4.Rdh8-/-	6	171
Abca4.Rdh8-/-	6	179
Abca4.Rdh8-/-	6	184
Abca4.Rdh8-/-	6	173
Abca4.Rdh8-/-	6	166
Abca4.Rdh8-/-	6	153
Abca4.Rdh8-/-	6	175
Abca4.Rdh8-/-	6	163
Abca4.Rdh8-/-	6	174
Abca4.Rdh8-/-	6	170
Abca4.Rdh8-/-	6	174
Abca4.Rdh8-/-	6	184
Abca4.Rdh8-/-	6	173
Abca4.Rdh8-/-	6	154
Abca4.Rdh8-/-	6	155
Abca4.Rdh8-/-	6	165
Abca4.Rdh8-/-	6	165
Abca4.Rdh8-/-	6	152
Abca4.Rdh8-/-	6	169
Abca4.Rdh8-/-	6	162
Abca4.Rdh8-/-	6	131
Abca4.Rdh8-/-	6	134
Abca4.Rdh8-/-	6	148
Abca4.Rdh8-/-	6	160
Abca4.Rdh8-/-	6	165
Abca4.Rdh8-/-	6	167
Abca4.Rdh8-/-	6	161
Abca4.Rdh8-/-	6	147
Abca4.Rdh8-/-	6	154
Abca4.Rdh8-/-	6	159
Abca4.Rdh8-/-	6	145
Abca4.Rdh8-/-	6	164
Abca4.Rdh8-/-	6	156
Abca4.Rdh8-/-	6	126
Abca4.Rdh8-/-	6	144
Abca4.Rdh8-/-	6	151
Abca4.Rdh8-/-	6	172
Abca4.Rdh8-/-	6	190
Abca4.Rdh8-/-	6	169
Abca4.Rdh8-/-	6	164
Abca4.Rdh8-/-	6	186
Abca4.Rdh8-/-	6	113
Abca4.Rdh8-/-	6	159
Abca4.Rdh8-/-	6	146
Abca4.Rdh8-/-	6	132
Abca4.Rdh8-/-	6	129
Abca4.Rdh8-/-	6	131
Abca4.Rdh8-/-	6	133
Abca4.Rdh8-/-	6	125
Abca4.Rdh8-/-	6	141
Abca4.Rdh8-/-	6	151
Abca4.Rdh8-/-	6	143
Abca4.Rdh8-/-	6	162
Abca4.Rdh8-/-	10	116
Abca4.Rdh8-/-	10	145
Abca4.Rdh8-/-	10	131
Abca4.Rdh8-/-	10	111
Abca4.Rdh8-/-	10	116
Abca4.Rdh8-/-	10	124
Abca4.Rdh8-/-	10	155
Abca4.Rdh8-/-	10	146
Abca4.Rdh8-/-	10	151
Abca4.Rdh8-/-	10	117
Abca4.Rdh8-/-	10	137
Abca4.Rdh8-/-	10	153
Abca4.Rdh8-/-	10	119
Abca4.Rdh8-/-	10	169
Abca4.Rdh8-/-	10	160
Abca4.Rdh8-/-	10	152
Abca4.Rdh8-/-	10	134
Abca4.Rdh8-/-	10	144
Abca4.Rdh8-/-	10	161
Abca4.Rdh8-/-	10	139
Abca4.Rdh8-/-	10	168
Abca4.Rdh8-/-	10	152
Abca4.Rdh8-/-	10	129
Abca4.Rdh8-/-	10	151
Abca4.Rdh8-/-	10	157
Abca4.Rdh8-/-	10	159
Abca4.Rdh8-/-	10	123
Abca4.Rdh8-/-	10	92
Abca4.Rdh8-/-	10	92
Abca4.Rdh8-/-	10	103
Abca4.Rdh8-/-	10	115
Abca4.Rdh8-/-	10	116
Abca4.Rdh8-/-	10	94
Abca4.Rdh8-/-	10	111
Abca4.Rdh8-/-	10	94
Abca4.Rdh8-/-	10	103
Abca4.Rdh8-/-	10	117
Abca4.Rdh8-/-	10	98
Abca4.Rdh8-/-	11	123
Abca4.Rdh8-/-	11	137
Abca4.Rdh8-/-	11	140
Abca4.Rdh8-/-	11	130
Abca4.Rdh8-/-	11	121
Abca4.Rdh8-/-	11	134
Abca4.Rdh8-/-	11	120
Abca4.Rdh8-/-	11	144
Abca4.Rdh8-/-	11	132
Abca4.Rdh8-/-	11	149
Abca4.Rdh8-/-	11	140
Abca4.Rdh8-/-	11	143
Abca4.Rdh8-/-	11	151
Abca4.Rdh8-/-	11	132
Abca4.Rdh8-/-	11	129
Abca4.Rdh8-/-	11	144
Abca4.Rdh8-/-	11	155
Abca4.Rdh8-/-	11	154
Abca4.Rdh8-/-	11	138
Abca4.Rdh8-/-	11	153
Abca4.Rdh8-/-	11	115
Abca4.Rdh8-/-	11	141
Abca4.Rdh8-/-	11	148
Abca4.Rdh8-/-	11	147
Abca4.Rdh8-/-	11	149
Abca4.Rdh8-/-	11	147
Abca4.Rdh8-/-	11	144
Abca4.Rdh8-/-	11	145
Abca4.Rdh8-/-	19	166
Abca4.Rdh8-/-	19	146
Abca4.Rdh8-/-	19	131
Abca4.Rdh8-/-	19	134
Abca4.Rdh8-/-	19	136
Abca4.Rdh8-/-	19	144
Abca4.Rdh8-/-	19	148
Abca4.Rdh8-/-	19	141
Abca4.Rdh8-/-	19	144
Abca4.Rdh8-/-	19	117
Abca4.Rdh8-/-	19	143
Abca4.Rdh8-/-	19	146
Abca4.Rdh8-/-	19	150
Abca4.Rdh8-/-	19	127
Abca4.Rdh8-/-	19	138
Abca4.Rdh8-/-	19	77
Abca4.Rdh8-/-	19	28
Abca4.Rdh8-/-	19	73
Abca4.Rdh8-/-	19	130
Abca4.Rdh8-/-	19	116
Abca4.Rdh8-/-	19	127
Abca4.Rdh8-/-	19	100
Abca4.Rdh8-/-	19	70
Abca4.Rdh8-/-	19	99
Abca4.Rdh8-/-	19	66
Abca4.Rdh8-/-	19	141
Abca4.Rdh8-/-	19	73
Abca4.Rdh8-/-	19	121
Abca4.Rdh8-/-	19	157
Abca4.Rdh8-/-	19	160
Abca4.Rdh8-/-	19	149
Abca4.Rdh8-/-	19	149
Abca4.Rdh8-/-	19	150
Abca4.Rdh8-/-	21	88
Abca4.Rdh8-/-	21	105
Abca4.Rdh8-/-	21	83
Abca4.Rdh8-/-	21	85
Abca4.Rdh8-/-	21	131
Abca4.Rdh8-/-	21	61
Abca4.Rdh8-/-	21	138
Abca4.Rdh8-/-	21	121
Abca4.Rdh8-/-	21	34
Abca4.Rdh8-/-	21	36
Abca4.Rdh8-/-	21	138
Abca4.Rdh8-/-	21	105
Abca4.Rdh8-/-	21	166
Abca4.Rdh8-/-	21	130
Abca4.Rdh8-/-	21	73
Abca4.Rdh8-/-	21	142
Abca4.Rdh8-/-	21	132
Abca4.Rdh8-/-	21	118
Abca4.Rdh8-/-	21	119
Abca4.Rdh8-/-	21	129
Abca4.Rdh8-/-	21	101
Abca4.Rdh8-/-	21	113
Abca4.Rdh8-/-	21	124
Abca4.Rdh8-/-	21	120
Abca4.Rdh8-/-	21	131
Abca4.Rdh8-/-	21	105
Abca4.Rdh8-/-	21	126
Abca4.Rdh8-/-	21	113
Abca4.Rdh8-/-	21	124
Abca4.Rdh8-/-	21	132
Abca4.Rdh8-/-	21	103
Abca4.Rdh8-/-	21	143
Abca4.Rdh8-/-	21	100
Abca4.Rdh8-/-	21	137
Abca4.Rdh8-/-	21	55
Abca4.Rdh8-/-	21	114
Abca4.Rdh8-/-	21	108
Abca4.Rdh8-/-	21	76
Abca4.Rdh8-/-	21	101
Abca4.Rdh8-/-	21	66
Abca4.Rdh8-/-	21	75
Abca4.Rdh8-/-	21	117
Abca4.Rdh8-/-	21	109
Abca4.Rdh8-/-	22	79
Abca4.Rdh8-/-	22	68
Abca4.Rdh8-/-	22	80
Abca4.Rdh8-/-	22	98
Abca4.Rdh8-/-	22	94
Abca4.Rdh8-/-	22	50
Abca4.Rdh8-/-	22	104
Abca4.Rdh8-/-	22	122
Abca4.Rdh8-/-	22	107
Abca4.Rdh8-/-	22	97
Abca4.Rdh8-/-	22	21
Abca4.Rdh8-/-	23	110
Abca4.Rdh8-/-	23	138
Abca4.Rdh8-/-	23	85
Abca4.Rdh8-/-	23	63
Abca4.Rdh8-/-	23	69
Abca4.Rdh8-/-	23	83
Abca4.Rdh8-/-	23	94
pigmented Abca4-/-	2	145
pigmented Abca4-/-	2	152
pigmented Abca4-/-	2	168
pigmented Abca4-/-	2	182
pigmented Abca4-/-	2	171
pigmented Abca4-/-	2	184
pigmented Abca4-/-	2	170
pigmented Abca4-/-	2	164
pigmented Abca4-/-	2	162
pigmented Abca4-/-	2	168
pigmented Abca4-/-	2	173
pigmented Abca4-/-	2	182
pigmented Abca4-/-	2	162
pigmented Abca4-/-	2	175
pigmented Abca4-/-	2	153
pigmented Abca4-/-	3	172
pigmented Abca4-/-	3	162
pigmented Abca4-/-	3	174
pigmented Abca4-/-	3	191
pigmented Abca4-/-	3	165
pigmented Abca4-/-	3	174
pigmented Abca4-/-	3	195
pigmented Abca4-/-	3	178
pigmented Abca4-/-	3	161
pigmented Abca4-/-	3	167
pigmented Abca4-/-	3	193
pigmented Abca4-/-	3	226
pigmented Abca4-/-	3	196
pigmented Abca4-/-	3	176
pigmented Abca4-/-	3	156
pigmented Abca4-/-	3	200
pigmented Abca4-/-	3	206
pigmented Abca4-/-	3	207
pigmented Abca4-/-	3	211
pigmented Abca4-/-	3	191
pigmented Abca4-/-	3	154
pigmented Abca4-/-	3	138
pigmented Abca4-/-	3	181
pigmented Abca4-/-	3	212
pigmented Abca4-/-	3	169
pigmented Abca4-/-	3	168
pigmented Abca4-/-	3	132
pigmented Abca4-/-	3	140
pigmented Abca4-/-	4	123
pigmented Abca4-/-	4	137
pigmented Abca4-/-	4	132
pigmented Abca4-/-	4	116
pigmented Abca4-/-	4	112
pigmented Abca4-/-	4	126
pigmented Abca4-/-	4	107
pigmented Abca4-/-	4	112
pigmented Abca4-/-	4	121
pigmented Abca4-/-	4	120
pigmented Abca4-/-	4	124
pigmented Abca4-/-	4	103
pigmented Abca4-/-	4	112
pigmented Abca4-/-	4	100
pigmented Abca4-/-	4	105
pigmented Abca4-/-	4	124
pigmented Abca4-/-	4	123
pigmented Abca4-/-	4	112
pigmented Abca4-/-	4	116
pigmented Abca4-/-	4	134
pigmented Abca4-/-	4	131
pigmented Abca4-/-	4	130
pigmented Abca4-/-	4	130
pigmented Abca4-/-	4	129
pigmented Abca4-/-	4	110
pigmented Abca4-/-	6	120
pigmented Abca4-/-	6	149
pigmented Abca4-/-	6	148
pigmented Abca4-/-	6	175
pigmented Abca4-/-	6	138
pigmented Abca4-/-	6	138
pigmented Abca4-/-	6	182
pigmented Abca4-/-	6	162
pigmented Abca4-/-	6	157
pigmented Abca4-/-	6	175
pigmented Abca4-/-	6	169
pigmented Abca4-/-	6	167
pigmented Abca4-/-	6	156
pigmented Abca4-/-	6	104
pigmented Abca4-/-	6	129
pigmented Abca4-/-	6	132
pigmented Abca4-/-	6	151
pigmented Abca4-/-	6	141
pigmented Abca4-/-	6	173
pigmented Abca4-/-	6	160
pigmented Abca4-/-	6	146
pigmented Abca4-/-	6	153
pigmented Abca4-/-	6	133
pigmented Abca4-/-	9	101
pigmented Abca4-/-	9	159
pigmented Abca4-/-	9	126
pigmented Abca4-/-	9	134
pigmented Abca4-/-	9	159
pigmented Abca4-/-	9	151
pigmented Abca4-/-	9	158
pigmented Abca4-/-	9	168
pigmented Abca4-/-	9	147
pigmented Abca4-/-	9	120
pigmented Abca4-/-	9	118
pigmented Abca4-/-	9	110
pigmented Abca4-/-	9	155
pigmented Abca4-/-	9	147
pigmented Abca4-/-	9	183
pigmented Abca4-/-	9	181
pigmented Abca4-/-	9	147
pigmented Abca4-/-	9	160
pigmented Abca4-/-	9	155
pigmented Abca4-/-	9	121
pigmented Abca4-/-	9	139
pigmented Abca4-/-	9	140
pigmented Abca4-/-	9	143
pigmented Abca4-/-	9	101
pigmented Abca4-/-	9	154
pigmented Abca4-/-	9	133
pigmented Abca4-/-	9	148
pigmented Abca4-/-	9	171
pigmented Abca4-/-	9	183
pigmented Abca4-/-	9	176
pigmented Abca4-/-	9	146
pigmented Abca4-/-	9	153
pigmented Abca4-/-	9	119
pigmented Abca4-/-	9	80
pigmented Abca4-/-	9	118
pigmented Abca4-/-	9	90
pigmented Abca4-/-	9	85
pigmented Abca4-/-	9	98
pigmented Abca4-/-	9	131
pigmented Abca4-/-	9	115
pigmented Abca4-/-	9	89
pigmented Abca4-/-	9	116
pigmented Abca4-/-	9	125
pigmented Abca4-/-	9	126
pigmented Abca4-/-	9	156
pigmented Abca4-/-	9	145
pigmented Abca4-/-	9	165
pigmented Abca4-/-	9	153
pigmented Abca4-/-	9	170
pigmented Abca4-/-	9	175
pigmented Abca4-/-	9	165
pigmented Abca4-/-	9	163
pigmented Abca4-/-	9	179
pigmented Abca4-/-	9	177
pigmented Abca4-/-	9	155
pigmented Abca4-/-	9	150
pigmented Abca4-/-	9	155
pigmented Abca4-/-	9	123
pigmented Abca4-/-	9	171
pigmented Abca4-/-	9	141
pigmented Abca4-/-	9	119
pigmented Abca4-/-	9	121
pigmented Abca4-/-	9	128
pigmented Abca4-/-	9	165
pigmented Abca4-/-	9	160
pigmented Abca4-/-	9	143
pigmented Abca4-/-	9	132
pigmented Abca4-/-	9	139
pigmented Abca4-/-	9	132
pigmented Abca4-/-	9	141
pigmented Abca4-/-	9	146
pigmented Abca4-/-	10	112
pigmented Abca4-/-	10	123
pigmented Abca4-/-	10	120
pigmented Abca4-/-	10	113
pigmented Abca4-/-	10	110
pigmented Abca4-/-	10	130
pigmented Abca4-/-	10	145
pigmented Abca4-/-	10	152
pigmented Abca4-/-	10	138
pigmented Abca4-/-	10	138
pigmented Abca4-/-	10	173
pigmented Abca4-/-	10	148
pigmented Abca4-/-	10	122
pigmented Abca4-/-	10	131
pigmented Abca4-/-	10	137
pigmented Abca4-/-	10	122
pigmented Abca4-/-	10	115
pigmented Abca4-/-	10	132
pigmented Abca4-/-	10	106
pigmented Abca4-/-	10	158
pigmented Abca4-/-	10	127
pigmented Abca4-/-	10	156
pigmented Abca4-/-	10	142
pigmented Abca4-/-	10	132
pigmented Abca4-/-	10	138
pigmented Abca4-/-	10	150
pigmented Abca4-/-	10	114
pigmented Abca4-/-	10	124
pigmented Abca4-/-	10	130
pigmented Abca4-/-	10	125
pigmented Abca4-/-	10	134
pigmented Abca4-/-	10	110
pigmented Abca4-/-	10	111
pigmented Abca4-/-	10	106
pigmented Abca4-/-	10	107
pigmented Abca4-/-	10	115
pigmented Abca4-/-	10	145
pigmented Abca4-/-	10	150
pigmented Abca4-/-	10	157
pigmented Abca4-/-	10	134
pigmented Abca4-/-	10	132
pigmented Abca4-/-	10	139
pigmented Abca4-/-	10	143
pigmented Abca4-/-	10	114
pigmented Abca4-/-	10	155
pigmented Abca4-/-	10	142
pigmented Abca4-/-	10	136
pigmented Abca4-/-	10	141
pigmented Abca4-/-	10	150
pigmented Abca4-/-	10	143
pigmented Abca4-/-	10	134
pigmented Abca4-/-	10	161
pigmented Abca4-/-	10	153
pigmented Abca4-/-	10	110
pigmented Abca4-/-	10	139
pigmented Abca4-/-	10	129
pigmented Abca4-/-	10	131
pigmented Abca4-/-	10	153
pigmented Abca4-/-	10	154
pigmented Abca4-/-	10	152
pigmented Abca4-/-	10	125
pigmented Abca4-/-	10	159
pigmented Abca4-/-	10	167
pigmented Abca4-/-	10	151
pigmented Abca4-/-	10	150
pigmented Abca4-/-	10	147
pigmented Abca4-/-	10	150
pigmented Abca4-/-	10	176
pigmented Abca4-/-	10	149
pigmented Abca4-/-	10	156
pigmented Abca4-/-	10	165
pigmented Abca4-/-	10	138
pigmented Abca4-/-	10	150
pigmented Abca4-/-	10	141
pigmented Abca4-/-	10	150
pigmented Abca4-/-	10	149
pigmented Abca4-/-	10	136
pigmented Abca4-/-	10	155
pigmented Abca4-/-	10	148
pigmented Abca4-/-	12	196
pigmented Abca4-/-	12	177
pigmented Abca4-/-	12	198
pigmented Abca4-/-	12	127
pigmented Abca4-/-	12	168
pigmented Abca4-/-	12	198
pigmented Abca4-/-	12	107
pigmented Abca4-/-	12	152
pigmented Abca4-/-	12	181
pigmented Abca4-/-	12	228
pigmented Abca4-/-	12	245
pigmented Abca4-/-	12	211
pigmented Abca4-/-	12	239
pigmented Abca4-/-	12	146
pigmented Abca4-/-	12	137
pigmented Abca4-/-	12	125
pigmented Abca4-/-	12	134
pigmented Abca4-/-	12	232
pigmented Abca4-/-	12	220
pigmented Abca4-/-	12	176
pigmented Abca4-/-	12	129
pigmented Abca4-/-	12	136
pigmented Abca4-/-	12	129
pigmented Abca4-/-	12	147
pigmented Abca4-/-	12	145
pigmented Abca4-/-	12	136
pigmented Abca4-/-	12	139
pigmented Abca4-/-	12	138
pigmented Abca4-/-	12	112
pigmented Abca4-/-	12	139
pigmented Abca4-/-	12	139
pigmented Abca4-/-	12	159
pigmented Abca4-/-	12	140
pigmented Abca4-/-	12	150
pigmented Abca4-/-	12	104
pigmented Abca4-/-	12	124
pigmented Abca4-/-	12	154
pigmented Abca4-/-	12	131
pigmented Abca4-/-	12	123
pigmented Abca4-/-	12	129
pigmented Abca4-/-	12	131
pigmented Abca4-/-	12	156
pigmented Abca4-/-	12	151
pigmented Abca4-/-	12	152
pigmented Abca4-/-	12	160
pigmented Abca4-/-	12	154
pigmented Abca4-/-	12	149
pigmented Abca4-/-	12	155
pigmented Abca4-/-	12	181
pigmented Abca4-/-	12	157
pigmented Abca4-/-	12	161
pigmented Abca4-/-	12	140
pigmented Abca4-/-	13	141
pigmented Abca4-/-	13	139
pigmented Abca4-/-	13	110
pigmented Abca4-/-	13	153
pigmented Abca4-/-	13	156
pigmented Abca4-/-	13	156
pigmented Abca4-/-	13	164
pigmented Abca4-/-	13	187
pigmented Abca4-/-	13	146
pigmented Abca4-/-	13	131
pigmented Abca4-/-	13	116
pigmented Abca4-/-	13	116
pigmented Abca4-/-	13	150
pigmented Abca4-/-	13	121
pigmented Abca4-/-	13	132
pigmented Abca4-/-	13	124
pigmented Abca4-/-	13	125
pigmented Abca4-/-	13	129
pigmented Abca4-/-	13	104
pigmented Abca4-/-	13	134
pigmented Abca4-/-	13	145
pigmented Abca4-/-	13	151
pigmented Abca4-/-	13	149
pigmented Abca4-/-	13	130
pigmented Abca4-/-	13	116
pigmented Abca4-/-	13	129
pigmented Abca4-/-	13	120
pigmented Abca4-/-	13	154
pigmented Abca4-/-	13	147
pigmented Abca4-/-	13	144
pigmented Abca4-/-	13	134
pigmented Abca4-/-	13	159
pigmented Abca4-/-	13	147
pigmented Abca4-/-	13	142
pigmented Abca4-/-	13	146
pigmented Abca4-/-	16	134
pigmented Abca4-/-	16	149
pigmented Abca4-/-	16	114
pigmented Abca4-/-	16	121
pigmented Abca4-/-	16	150
pigmented Abca4-/-	16	119
pigmented Abca4-/-	18	151
pigmented Abca4-/-	18	185
pigmented Abca4-/-	18	120
pigmented Abca4-/-	18	129
pigmented Abca4-/-	18	147
pigmented Abca4-/-	18	150
pigmented Abca4-/-	18	167
pigmented Abca4-/-	18	148
pigmented Abca4-/-	18	143
pigmented Abca4-/-	18	145
pigmented Abca4-/-	18	160
pigmented Abca4-/-	18	134
pigmented Abca4-/-	18	106
pigmented Abca4-/-	18	148
pigmented Abca4-/-	18	151
pigmented Abca4-/-	22	139
pigmented Abca4-/-	22	139
pigmented Abca4-/-	22	151
pigmented Abca4-/-	22	141
pigmented Abca4-/-	22	149
pigmented Abca4-/-	22	173
pigmented Abca4-/-	22	132
pigmented Abca4-/-	22	152
