# Supplementary material for: Ultrastructural alterations in the retinal pigment epithelium and photoreceptors of a Stargardt patient and three Stargardt mouse models: indication for the central role of RPE melanin in oxidative stress
Source: PeerJ. 2018 Jul 19;6:e5215. doi: 10.7717/peerj.5215 (PMC6054867; doi:10.7717/peerj.5215)
Supplement: Supplemental Information 7 — Raw data for thickening of Bruch’s membrane. [file peerj-06-5215-s010.xlsx]

## Sheet: Raw Data Fig. 7
Stamm	age [months]	Thickness of Bruch's membrane [µm]
Albino Abca4	4	0.721853
Albino Abca4	4	0.737641
Albino Abca4	4	0.78733
Albino Abca4	4	0.646813
Albino Abca4	4	0.475621
Albino Abca4	4	0.662457
Albino Abca4	4	0.682298
Albino Abca4	4	0.507678
Albino Abca4	4	0.488705
Albino Abca4	4	0.50798
Albino Abca4	4	0.616658
Albino Abca4	4	0.532019
Albino Abca4	4	0.602968
Albino Abca4	4	0.601378
Albino Abca4	4	0.634144
Albino Abca4	4	0.351481
Albino Abca4	4	0.45198
Albino Abca4	4	0.383011
Albino Abca4	4	0.497393
Albino Abca4	4	0.496555
Albino Abca4	4	0.433032
Albino Abca4	4	0.418367
Albino Abca4	4	0.586822
Albino Abca4	4	0.487822
Albino Abca4	4	0.580107
Albino Abca4	4	0.53361
Albino Abca4	4	0.584813
Albino Abca4	4	0.531826
Albino Abca4	4	0.47032
Albino Abca4	4	0.571256
Albino Abca4	6	0.474036
Albino Abca4	6	0.476895
Albino Abca4	6	0.406528
Albino Abca4	6	0.350649
Albino Abca4	6	0.431662
Albino Abca4	6	0.511636
Albino Abca4	6	0.399746
Albino Abca4	6	0.53592
Albino Abca4	6	0.470476
Albino Abca4	6	0.483955
Albino Abca4	6	0.55716
Albino Abca4	6	0.533911
Albino Abca4	6	0.558195
Albino Abca4	6	0.482321
Albino Abca4	6	0.657762
Albino Abca4	6	0.405105
Albino Abca4	6	0.558667
Albino Abca4	6	0.511007
Albino Abca4	6	0.476481
Albino Abca4	6	0.51477
Albino Abca4	6	0.468982
Albino Abca4	6	0.47711
Albino Abca4	6	0.551131
Albino Abca4	6	0.504732
Albino Abca4	6	0.412614
Albino Abca4	6	0.535265
Albino Abca4	6	0.561811
Albino Abca4	6	0.584901
Albino Abca4	6	0.531194
Albino Abca4	6	0.529181
Albino Abca4	9	0.407139
Albino Abca4	9	0.593153
Albino Abca4	9	0.467483
Albino Abca4	9	0.534322
Albino Abca4	9	0.493365
Albino Abca4	9	0.529622
Albino Abca4	9	0.507678
Albino Abca4	9	0.550866
Albino Abca4	9	0.444675
Albino Abca4	9	0.558837
Albino Abca4	9	0.399801
Albino Abca4	9	0.466575
Albino Abca4	9	0.55507
Albino Abca4	9	0.447739
Albino Abca4	9	0.419292
Albino Abca4	9	0.455026
Albino Abca4	9	0.510134
Albino Abca4	9	0.467045
Albino Abca4	9	0.435976
Albino Abca4	9	0.495656
Albino Abca4	9	0.506178
Albino Abca4	9	0.869408
Albino Abca4	9	0.514145
Albino Abca4	9	0.557199
Albino Abca4	9	0.651867
Albino Abca4	9	0.709113
Albino Abca4	9	0.467811
Albino Abca4	9	0.545867
Albino Abca4	9	0.547458
Albino Abca4	9	0.52806
Albino Abca4	12	0.65071
Albino Abca4	12	0.68348
Albino Abca4	12	0.64731
Albino Abca4	12	0.89992
Albino Abca4	12	0.56842
Albino Abca4	12	0.63656
Albino Abca4	12	0.719
Albino Abca4	12	0.65213
Albino Abca4	12	0.64087
Albino Abca4	12	0.85291
Albino Abca4	12	0.6497
Albino Abca4	12	0.67315
Albino Abca4	12	0.79241
Albino Abca4	12	0.61682
Albino Abca4	12	0.69528
Albino Abca4	12	0.65223
Albino Abca4	12	0.78701
Albino Abca4	12	0.65348
Albino Abca4	12	0.69438
Albino Abca4	12	0.491
Albino Abca4	12	0.64619
Albino Abca4	12	0.67453
Albino Abca4	12	0.63359
Albino Abca4	12	0.78384
Albino Abca4	12	0.74858
Albino Abca4	12	0.75855
Albino Abca4	12	0.66546
Albino Abca4	12	0.59389
Albino Abca4	12	0.75054
Albino Abca4	12	0.82407
Albino Abca4	15	0.511422
Albino Abca4	15	0.557894
Albino Abca4	15	0.713061
Albino Abca4	15	0.751007
Albino Abca4	15	0.536425
Albino Abca4	15	0.609096
Albino Abca4	15	0.683412
Albino Abca4	15	0.57839
Albino Abca4	15	0.755065
Albino Abca4	15	0.569526
Albino Abca4	15	0.579186
Albino Abca4	15	0.802959
Albino Abca4	15	0.795385
Albino Abca4	15	0.669133
Albino Abca4	15	0.787005
Albino Abca4	15	0.765153
Albino Abca4	15	0.55738
Albino Abca4	15	0.74049
Albino Abca4	15	0.62437
Albino Abca4	15	0.76312
Albino Abca4	15	0.6669
Albino Abca4	15	0.48921
Albino Abca4	15	0.54034
Albino Abca4	15	0.49855
Albino Abca4	15	0.52154
Albino Abca4	15	0.56746
Albino Abca4	15	0.55679
Albino Abca4	15	0.58164
Albino Abca4	15	0.7798
Albino Abca4	15	0.54446
Albino Abca4	15	0.96967
Albino Abca4	18	0.76278
Albino Abca4	18	0.82909
Albino Abca4	18	0.623237
Albino Abca4	18	0.485599
Albino Abca4	18	0.489438
Albino Abca4	18	0.685782
Albino Abca4	18	0.540213
Albino Abca4	18	0.562955
Albino Abca4	18	0.569513
Albino Abca4	18	0.516698
Albino Abca4	18	0.555267
Albino Abca4	18	0.627644
Albino Abca4	18	0.536411
Albino Abca4	18	1.12293
Albino Abca4	18	0.504166
Albino Abca4	18	0.484288
Albino Abca4	18	0.551781
Albino Abca4	18	0.650014
Albino Abca4	18	0.667952
Albino Abca4	18	0.891001
Albino Abca4	18	1.1388
Albino Abca4	18	0.765201
Albino Abca4	18	0.654654
Albino Abca4	18	0.73032
Albino Abca4	18	0.714515
Albino Abca4	18	0.646462
Albino Abca4	18	1.00351
Albino Abca4	18	0.753572
Albino Abca4	18	0.978801
Albino Abca4	18	0.594839
Albino Abca4	21	0.87424
Albino Abca4	21	0.95187
Albino Abca4	21	0.98677
Albino Abca4	21	0.90504
Albino Abca4	21	0.63213
Albino Abca4	21	0.53784
Albino Abca4	21	0.5654
Albino Abca4	21	0.48718
Albino Abca4	21	0.63339
Albino Abca4	21	0.39769
Albino Abca4	21	0.50639
Albino Abca4	21	0.87714
Albino Abca4	21	0.64999
Albino Abca4	21	0.86974
Albino Abca4	21	0.91579
Albino Abca4	21	0.95515
Albino Abca4	21	0.92625
Albino Abca4	21	0.48051
Albino Abca4	21	0.55789
Albino Abca4	21	0.59653
Albino Abca4	21	0.65308
Albino Abca4	21	0.53918
Albino Abca4	21	1.25839
Albino Abca4	21	0.70953
Albino Abca4	21	0.64478
Albino Abca4	21	0.70646
Albino Abca4	21	0.99079
Albino Abca4	21	0.86561
Albino Abca4	21	0.62996
Albino Abca4	21	1.06435
Abca4.Rdh8	3	0.47148
Abca4.Rdh8	3	0.37707
Abca4.Rdh8	3	0.48001
Abca4.Rdh8	3	0.3592
Abca4.Rdh8	3	0.42082
Abca4.Rdh8	3	0.37063
Abca4.Rdh8	3	0.34593
Abca4.Rdh8	3	0.37658
Abca4.Rdh8	3	0.3728
Abca4.Rdh8	3	0.44664
Abca4.Rdh8	3	0.31683
Abca4.Rdh8	3	0.32805
Abca4.Rdh8	3	0.36709
Abca4.Rdh8	3	0.58145
Abca4.Rdh8	3	0.33687
Abca4.Rdh8	3	0.33036
Abca4.Rdh8	3	0.36631
Abca4.Rdh8	3	0.46906
Abca4.Rdh8	3	0.37395
Abca4.Rdh8	3	0.39385
Abca4.Rdh8	3	0.54587
Abca4.Rdh8	3	0.47186
Abca4.Rdh8	3	0.33797
Abca4.Rdh8	3	0.32516
Abca4.Rdh8	3	0.34612
Abca4.Rdh8	3	0.42233
Abca4.Rdh8	3	0.36913
Abca4.Rdh8	3	0.34174
Abca4.Rdh8	3	0.29531
Abca4.Rdh8	3	0.3285
Abca4.Rdh8	6	0.48854
Abca4.Rdh8	6	0.43937
Abca4.Rdh8	6	0.36437
Abca4.Rdh8	6	0.47934
Abca4.Rdh8	6	0.4264
Abca4.Rdh8	6	0.36955
Abca4.Rdh8	6	0.37652
Abca4.Rdh8	6	0.4242
Abca4.Rdh8	6	0.47625
Abca4.Rdh8	6	0.37248
Abca4.Rdh8	6	0.47303
Abca4.Rdh8	6	0.34493
Abca4.Rdh8	6	0.32141
Abca4.Rdh8	6	0.35748
Abca4.Rdh8	6	0.37339
Abca4.Rdh8	6	0.67868
Abca4.Rdh8	6	0.5764
Abca4.Rdh8	6	0.52171
Abca4.Rdh8	6	0.45314
Abca4.Rdh8	6	0.39121
Abca4.Rdh8	6	0.40929
Abca4.Rdh8	6	0.58712
Abca4.Rdh8	6	0.49504
Abca4.Rdh8	6	0.54786
Abca4.Rdh8	6	0.69672
Abca4.Rdh8	6	0.46775
Abca4.Rdh8	6	0.65026
Abca4.Rdh8	6	0.47599
Abca4.Rdh8	6	0.58861
Abca4.Rdh8	6	0.54108
Abca4.Rdh8	9	0.32669
Abca4.Rdh8	9	0.49123
Abca4.Rdh8	9	0.51539
Abca4.Rdh8	9	0.49331
Abca4.Rdh8	9	0.47196
Abca4.Rdh8	9	0.69151
Abca4.Rdh8	9	0.35096
Abca4.Rdh8	9	0.37223
Abca4.Rdh8	9	0.47192
Abca4.Rdh8	9	0.45055
Abca4.Rdh8	9	0.46101
Abca4.Rdh8	9	0.57114
Abca4.Rdh8	9	0.47616
Abca4.Rdh8	9	0.59018
Abca4.Rdh8	9	0.39083
Abca4.Rdh8	12	0.47285
Abca4.Rdh8	12	0.56746
Abca4.Rdh8	12	0.43195
Abca4.Rdh8	12	0.52473
Abca4.Rdh8	12	0.57742
Abca4.Rdh8	12	0.40048
Abca4.Rdh8	12	0.47846
Abca4.Rdh8	12	0.4087
Abca4.Rdh8	12	0.34338
Abca4.Rdh8	12	0.3451
Abca4.Rdh8	12	0.31874
Abca4.Rdh8	12	0.35264
Abca4.Rdh8	12	0.44449
Abca4.Rdh8	12	0.49538
Abca4.Rdh8	12	0.53798
Abca4.Rdh8	12	0.60333
Abca4.Rdh8	12	0.78155
Abca4.Rdh8	12	0.42233
Abca4.Rdh8	12	0.39346
Abca4.Rdh8	12	0.60239
Abca4.Rdh8	12	0.56136
Abca4.Rdh8	12	0.4943
Abca4.Rdh8	12	0.87034
Abca4.Rdh8	12	0.52161
Abca4.Rdh8	12	0.64375
Abca4.Rdh8	12	0.37514
Abca4.Rdh8	12	0.42526
Abca4.Rdh8	12	0.54034
Abca4.Rdh8	12	0.45198
Abca4.Rdh8	12	0.47807
Abca4.Rdh8	12	0.80373
Abca4.Rdh8	14	0.48607
Abca4.Rdh8	14	0.51477
Abca4.Rdh8	14	0.75411
Abca4.Rdh8	14	0.73134
Abca4.Rdh8	14	0.54678
Abca4.Rdh8	14	0.53039
Abca4.Rdh8	14	0.45506
Abca4.Rdh8	14	0.87008
Abca4.Rdh8	14	0.47931
Abca4.Rdh8	14	0.35446
Abca4.Rdh8	14	1.43284
Abca4.Rdh8	14	0.4057
Abca4.Rdh8	14	0.42696
Abca4.Rdh8	14	0.38573
Abca4.Rdh8	14	0.46
Abca4.Rdh8	23	0.73985
Abca4.Rdh8	23	0.95104
Abca4.Rdh8	23	0.57603
Abca4.Rdh8	23	1.91032
Abca4.Rdh8	23	1.18021
Abca4.Rdh8	23	0.54317
Abca4.Rdh8	23	0.56775
Abca4.Rdh8	23	0.55909
Abca4.Rdh8	23	1.22931
Abca4.Rdh8	23	0.89921
Abca4.Rdh8	23	0.83029
Abca4.Rdh8	23	0.83741
Abca4.Rdh8	23	0.57417
Abca4.Rdh8	23	0.7265
Abca4.Rdh8	23	1.5686
Abca4.Rdh8	23	0.85681
Abca4.Rdh8	23	0.91365
Abca4.Rdh8	23	0.882
Abca4.Rdh8	23	0.95017
Abca4.Rdh8	23	1.40133
Abca4.Rdh8	23	1.28054
Abca4.Rdh8	23	1.44467
Abca4.Rdh8	23	0.64592
Abca4.Rdh8	23	0.77252
Abca4.Rdh8	23	0.5957
Abca4.Rdh8	23	0.86367
Abca4.Rdh8	23	0.59904
Abca4.Rdh8	23	0.66231
Abca4.Rdh8	23	0.58585
Abca4.Rdh8	23	0.55458
Abca4.Rdh8	25	0.99309
Abca4.Rdh8	25	0.71148
Abca4.Rdh8	25	0.43777
Abca4.Rdh8	25	0.39716
Abca4.Rdh8	25	0.40547
Abca4.Rdh8	25	0.54687
Abca4.Rdh8	25	1.11975
Abca4.Rdh8	25	1.95258
Abca4.Rdh8	25	0.67722
Abca4.Rdh8	25	0.6562
Abca4.Rdh8	25	0.45379
Abca4.Rdh8	25	0.38626
Abca4.Rdh8	25	0.67175
Abca4.Rdh8	25	0.52785
Abca4.Rdh8	25	0.51641
Abca4.Rdh8	25	0.383583
Abca4.Rdh8	25	0.65784
Abca4.Rdh8	25	0.525229
Abca4.Rdh8	25	0.458611
Abca4.Rdh8	25	0.296891
Abca4.Rdh8	25	0.401771
Abca4.Rdh8	25	0.510478
Abca4.Rdh8	25	0.451446
Abca4.Rdh8	25	0.298634
Abca4.Rdh8	25	0.51386
Abca4.Rdh8	25	0.416914
Abca4.Rdh8	25	0.43616
Abca4.Rdh8	25	0.853292
Abca4.Rdh8	25	0.497261
Abca4.Rdh8	25	1.45904
Abca4.Rdh8	9	0.7165
Abca4.Rdh8	9	0.54967
Abca4.Rdh8	9	0.52182
Abca4.Rdh8	9	0.53405
Abca4.Rdh8	9	0.50962
Abca4.Rdh8	9	0.71164
Abca4.Rdh8	9	0.73104
Abca4.Rdh8	9	0.64147
Abca4.Rdh8	9	0.49707
Abca4.Rdh8	9	0.72362
Abca4.Rdh8	9	0.62952
Abca4.Rdh8	9	0.66188
Abca4.Rdh8	9	1.02116
Abca4.Rdh8	9	0.83479
Abca4.Rdh8	9	0.90252
Abca4.Rdh8	14	0.89251
Abca4.Rdh8	14	0.77995
Abca4.Rdh8	14	0.86442
Abca4.Rdh8	14	0.97517
Abca4.Rdh8	14	1.11415
Abca4.Rdh8	14	1.23309
Abca4.Rdh8	14	0.96448
Abca4.Rdh8	14	0.73894
Abca4.Rdh8	14	0.80909
Abca4.Rdh8	14	0.65776
Abca4.Rdh8	14	0.7311
Abca4.Rdh8	14	0.74113
Abca4.Rdh8	14	0.82261
Abca4.Rdh8	14	0.71595
Abca4.Rdh8	14	0.80496
Abca4.Rdh8	19	0.484876
Abca4.Rdh8	19	0.581956
Abca4.Rdh8	19	1.47895
Abca4.Rdh8	19	0.950382
Abca4.Rdh8	19	0.790906
Abca4.Rdh8	19	0.400239
Abca4.Rdh8	19	0.400313
Abca4.Rdh8	19	0.440231
Abca4.Rdh8	19	0.638715
Abca4.Rdh8	19	0.477646
Abca4.Rdh8	19	1.02536
Abca4.Rdh8	19	0.501827
Abca4.Rdh8	19	0.701401
Abca4.Rdh8	19	0.624081
Abca4.Rdh8	19	0.592969
Abca4.Rdh8	19	0.444922
Abca4.Rdh8	19	0.602386
Abca4.Rdh8	19	0.543881
Abca4.Rdh8	19	0.530395
Abca4.Rdh8	19	0.465493
Abca4.Rdh8	19	0.317383
Abca4.Rdh8	19	0.438834
Abca4.Rdh8	19	0.389821
Abca4.Rdh8	19	0.880138
Abca4.Rdh8	19	0.378461
Abca4.Rdh8	19	0.566618
Abca4.Rdh8	19	0.401498
Abca4.Rdh8	19	0.541227
Abca4.Rdh8	19	0.538913
Abca4.Rdh8	19	0.438134
pigm. Abca4	2	0.38179
pigm. Abca4	2	0.35004
pigm. Abca4	2	0.24901
pigm. Abca4	2	0.38988
pigm. Abca4	2	0.27554
pigm. Abca4	2	0.32939
pigm. Abca4	2	0.56119
pigm. Abca4	2	0.32885
pigm. Abca4	2	0.42103
pigm. Abca4	2	0.41641
pigm. Abca4	2	0.35726
pigm. Abca4	2	0.32557
pigm. Abca4	2	0.43049
pigm. Abca4	2	0.33025
pigm. Abca4	2	0.37327
pigm. Abca4	2	0.39316
pigm. Abca4	4	0.42082
pigm. Abca4	4	0.29709
pigm. Abca4	4	0.24724
pigm. Abca4	4	0.28411
pigm. Abca4	4	0.25484
pigm. Abca4	4	0.32534
pigm. Abca4	4	0.31349
pigm. Abca4	4	0.31681
pigm. Abca4	4	0.42166
pigm. Abca4	4	0.3279
pigm. Abca4	4	0.29182
pigm. Abca4	4	0.34493
pigm. Abca4	4	0.26093
pigm. Abca4	4	0.29696
pigm. Abca4	4	0.19301
pigm. Abca4	4	0.3823
pigm. Abca4	4	0.28132
pigm. Abca4	4	0.2959
pigm. Abca4	4	0.23955
pigm. Abca4	4	0.33858
pigm. Abca4	4	0.31993
pigm. Abca4	4	0.20537
pigm. Abca4	4	0.2394
pigm. Abca4	4	0.3232
pigm. Abca4	4	0.25421
pigm. Abca4	4	0.28575
pigm. Abca4	4	0.23449
pigm. Abca4	4	0.25207
pigm. Abca4	4	0.26866
pigm. Abca4	4	0.28971
pigm. Abca4	6	0.26003
pigm. Abca4	6	0.31461
pigm. Abca4	6	0.30049
pigm. Abca4	6	0.41971
pigm. Abca4	6	0.28901
pigm. Abca4	6	0.29265
pigm. Abca4	6	0.25877
pigm. Abca4	6	0.28537
pigm. Abca4	6	0.28194
pigm. Abca4	6	0.32537
pigm. Abca4	6	0.31688
pigm. Abca4	6	0.24001
pigm. Abca4	6	0.33386
pigm. Abca4	6	0.34219
pigm. Abca4	6	0.683925
pigm. Abca4	6	0.613401
pigm. Abca4	6	0.620534
pigm. Abca4	6	0.57748
pigm. Abca4	6	0.529222
pigm. Abca4	6	0.597084
pigm. Abca4	6	0.492059
pigm. Abca4	6	0.534609
pigm. Abca4	6	0.625228
pigm. Abca4	6	0.492653
pigm. Abca4	6	0.444494
pigm. Abca4	6	0.439716
pigm. Abca4	6
pigm. Abca4	6
pigm. Abca4	9	0.43241
pigm. Abca4	9	0.41755
pigm. Abca4	9	0.39766
pigm. Abca4	9	0.4554
pigm. Abca4	9	0.66273
pigm. Abca4	9	0.55284
pigm. Abca4	9	0.36923
pigm. Abca4	9	0.37248
pigm. Abca4	9	0.51555
pigm. Abca4	9	0.47172
pigm. Abca4	9	0.44137
pigm. Abca4	9	0.56945
pigm. Abca4	9	0.95698
pigm. Abca4	9	0.51896
pigm. Abca4	9	0.36274
pigm. Abca4	9	0.5581
pigm. Abca4	9	0.42207
pigm. Abca4	9	0.38543
pigm. Abca4	9	0.37024
pigm. Abca4	9	0.45089
pigm. Abca4	9	0.44278
pigm. Abca4	9	0.29032
pigm. Abca4	9	0.33543
pigm. Abca4	9	0.4033
pigm. Abca4	9	0.35469
pigm. Abca4	9	0.35165
pigm. Abca4	9	0.33884
pigm. Abca4	9	0.25438
pigm. Abca4	9	0.25421
pigm. Abca4	9	0.34084
pigm. Abca4	12	0.433437
pigm. Abca4	12	0.533733
pigm. Abca4	12	0.472924
pigm. Abca4	12	0.43401
pigm. Abca4	12	0.414258
pigm. Abca4	12	0.441375
pigm. Abca4	12	0.646462
pigm. Abca4	12	0.77129
pigm. Abca4	12	0.531812
pigm. Abca4	12	0.437967
pigm. Abca4	12	0.606498
pigm. Abca4	12	0.535443
pigm. Abca4	12	0.717914
pigm. Abca4	12	1.40097
pigm. Abca4	12	1.04379
pigm. Abca4	12	0.549378
pigm. Abca4	12	0.38828
pigm. Abca4	12	0.42006
pigm. Abca4	12	0.40611
pigm. Abca4	12	0.35221
pigm. Abca4	12	0.42737
pigm. Abca4	12	0.4232
pigm. Abca4	12	0.45177
pigm. Abca4	12	0.34255
pigm. Abca4	12	0.46455
pigm. Abca4	12	0.553
pigm. Abca4	12	0.44051
pigm. Abca4	12	0.44157
pigm. Abca4	12	0.66194
pigm. Abca4	12	1.28114
pigm. Abca4	12	0.44011
pigm. Abca4	12	0.41746
pigm. Abca4	16	0.40266
pigm. Abca4	16	0.46795
pigm. Abca4	16	0.37732
pigm. Abca4	16	0.38862
pigm. Abca4	16	0.47711
pigm. Abca4	16	0.49152
pigm. Abca4	16	0.43571
pigm. Abca4	16	0.46948
pigm. Abca4	16	0.4087
pigm. Abca4	16	0.40934
pigm. Abca4	16	0.34289
pigm. Abca4	16	0.46076
pigm. Abca4	16	0.43757
pigm. Abca4	16	0.516
pigm. Abca4	16	0.39744
pigm. Abca4	16	0.48252
pigm. Abca4	18	0.60036
pigm. Abca4	18	0.80636
pigm. Abca4	18	0.81965
pigm. Abca4	18	0.5731
pigm. Abca4	18	0.68099
pigm. Abca4	18	0.59713
pigm. Abca4	18	0.59389
pigm. Abca4	18	0.59521
pigm. Abca4	18	0.56467
pigm. Abca4	18	0.5937
pigm. Abca4	18	0.64456
pigm. Abca4	18	0.64714
pigm. Abca4	18	0.73986
pigm. Abca4	18	0.93592
pigm. Abca4	18	0.70492
pigm. Abca4	22	0.93108
pigm. Abca4	22	0.58521
pigm. Abca4	22	0.57267
pigm. Abca4	22	0.96443
pigm. Abca4	22	0.68164
pigm. Abca4	22	0.89181
pigm. Abca4	22	1.02244
pigm. Abca4	22	0.7532
pigm. Abca4	22	1.29486
pigm. Abca4	22	1.06175
pigm. Abca4	22	1.02182
pigm. Abca4	22	0.76427
pigm. Abca4	22	0.88147
pigm. Abca4	22	0.9118
pigm. Abca4	22	1.15076
